# Supplementary material for: Why we still perform arthroscopy in knee osteoarthritis: a multi-methods study
Source: Springer Nature journal article supplement (doi:10.1186/s12891-015-0537-y), 2015-04-10
Supplement: MOESM1 [file 9752288]

# Arthroscopy in knee osteoarthritis

## 1. What grade of orthopaedic surgeon are you?

- Consultant
- Speciality Registrar
- Associate Specialist/Staff Grade

Other (please specify)

## 2. Are you aware of any RCT or systematic reviews that deal with knee arthroscopies in OA?

- Yes
- No

## 3. Are you aware of NICE guidelines on knee arthroscopies in OA?

- Yes
- No

## 4. Are the guidelines applicable to your practice?

Strongly disagree

Disagree

Niether agree nor disagree

Agree

Strongly agree

## 5. If you are aware of the guidelines, do you agree with them?

Strongly disagree

Disagree

Niether disagree nor agree

Agree

Stongly agree

## 6. Please explain your answer to question 5.

## 7. Do you think that knee arthroscopy delays the need for a TKR in knee OA?

Strongly disagree

Disagree

Niether disagree nor agree

Agree

Strongly Agree

## 8. Do you think that knee arthroscopy improves outcome in patients with knee OA?

Strongly disagree

Disagree

Niether disagree nor agree

Agree

Strongly agree

## 9. Do you feel under pressure to offer an operation to patients with knee OA who you do not think require a TKR?

Strongly disagree

Disagree

Niether disagree nor agree

Agree

Strongly agree

# Arthroscopy in knee osteoarthritis

## 10. Do you commonly use arthroscopy to diagnose OA knee?

Strongly disagree

Disagree

Niether agree nor disagree

Agree

Strongly agree

## 11. In patients with OA knee and no locking or mechanical symptoms, do you use arthroscopy to rule out other intra-articular pathology?

Strongly disagree

Disagree

Niether disagree nor agree

Agree

Strongly agree

## 12. Do you use arthroscopy to diagnose/treat patients with OA knee and mechanical symptoms, but no locking?

Strongly disagree

Disagree

Niether agree nor disagree

Agree

Strongly agree

## 13. Do you think arthroscopy has a place in 10 and 11 Above?

Yes

No

## 14. If yes, please expand on your answer.

## 15. In a patient where OA knee is a possible diagnosis, would a non-WB plain film +/- MRI sufficiently rule out significant OA, such that an arthroscopy could be appropriate?

Strongly disagree

Disagree

Niether disagree nor agree

Agree

Strongly agree

## 16. Are you aware of any financial incentive not to perform knee arthroscopy in patients with OA?

Yes

No

## 17. If yes, please expand on your answer.

## 18. Are you aware of any regulatory process in place designed to monitor knee arthroscopy in patients with OA?

Yes

No

## 19. If yes, please expand on your answer.

## Arthroscopy in knee osteoarthritis

**20. Do you feel there are practical issues that result in offering, and performing, arthroscopies in patients with knee OA?**

Yes

No

**21. If yes, please expand on your answer.**
